# Supplementary material for: Molecular and Enzymatic Characterization of Flavonoid 3′-Hydroxylase of Malus × domestica
Source: MDPI journal article supplement (doi:10.3390/plants10091956), 2021-09-19
Supplement: s1 [file s1]

## Supplementary Material

**Supplementary Figure S1.** Pairwise alignments of the deduced amino acid sequences of *F3'H* cDNA clones of *Malus × domestica*. Comparison of a: newly isolated MdF3'HI (MH468788) with NCBI FJ919631 (Han et al. 2010), b: newly isolated MdF3'HII (MH468789) with NCBI FJ919633 (Han et al. 2010), and c: the newly isolated MdF3'HI (MH468788) and MdF3'HII (MH468789). Differences in the amino acid sequences are highlighted in grey-shading. Regions serving as substrate recognition sites (SRS1-6) according to Gotoh (1992) are underlined.

a

|                       |                    |                    |                     |                   |                    |
|-----------------------|--------------------|--------------------|---------------------|-------------------|--------------------|
|                       | 1                  |                    |                     |                   | 50                 |
| <b>F3'HI_FJ919631</b> | MFVLIVFTVV         | FAFFLYRIFA         | PGGSRHSLPL          | PPGPKPWPVV        | GNLPHLGPVP         |
| <b>MdF3'HI</b>        | MFVLIVFTVV         | FAFFLYRIFA         | PGGSRHSLPL          | PPGPKPWPVV        | GNLPHLGPVP         |
|                       | 51                 |                    |                     |                   | 100                |
| <b>F3'HI_FJ919631</b> | HHSLAALARQ         | YGPLMHLRLG         | FVDVVVAASA          | SVASQFLKTH        | DANFSSSRPPN        |
| <b>MdF3'HI</b>        | HHSLAALARQ         | YGPLMHLRLG         | FVDVVVAASA          | SVASQFLKTH        | DANFSSSRPPN        |
|                       | 101                | <b>SRS1</b>        |                     |                   | 150                |
| <b>F3'HI_FJ919631</b> | <u>SGAKHLAYNY</u>  | <u>QDLVFAPYGP</u>  | RWRLLRKISS          | VHLFSGKALD        | DLKHVRQEEV         |
| <b>MdF3'HI</b>        | <u>SGAKHLAYNY</u>  | <u>QDLVFAPYGP</u>  | RWRLLRKISS          | VHLFSGKALD        | DLKHVRQEEV         |
|                       | 151                |                    |                     |                   | 200                |
| <b>F3'HI_FJ919631</b> | GVLAHGLASA         | GSKPVNLAQL         | LVNCTVNALG          | RVMVGRRLFG        | NGMGGEDPKA         |
| <b>MdF3'HI</b>        | GVLAHGLASA         | GSKPVNLAQL         | LVNCTVNALG          | RVMVGRRLFG        | NGMGGEDPKA         |
|                       | 201                | <b>SRS2</b>        |                     | <b>SRS3</b>       | 250                |
| <b>F3'HI_FJ919631</b> | DEFKSMVVEM         | <u>MVL</u> AGVFNIG | DFIP <u>S</u> LEWLD | LQGVAGKMKK        | LHKRFDAFLT         |
| <b>MdF3'HI</b>        | DEFKSMVVEM         | <u>IVL</u> AGVFNIG | DFIS <u>S</u> LEWLD | LQGVAGKMKK        | LHKRFDAFLT         |
|                       | 251                |                    |                     | <b>SRS4</b>       | 300                |
| <b>F3'HI_FJ919631</b> | AIVEEHKRSR         | GGKHVDMLTT         | LLSLKEDADG          | EGAKLTDTEI        | <u>KALLLNMF</u> TA |
| <b>MdF3'HI</b>        | AIVEEHKRSR         | GGKHVDMLTT         | LLSLKEDADG          | EGAKLTDTEI        | <u>KALLLNMF</u> TA |
|                       | 301                |                    |                     |                   | 350                |
| <b>F3'HI_FJ919631</b> | <u>GTD</u> TSSSTVE | WAIAELLRHP         | KILAQLQOEL          | DQVVGRDRLV        | TESDLPNLTY         |
| <b>MdF3'HI</b>        | <u>GTD</u> TSSSTVE | WAIAELLRHP         | KILAQLQOEL          | DQVVGRDRLV        | TESDLPNLTY         |
|                       | 351                | <b>SRS5</b>        |                     |                   | 400                |
| <b>F3'HI_FJ919631</b> | LQAVIKETFR         | <u>LHPSTPLSLP</u>  | RMATESCEIN          | GFHIPKGATL        | LVNVWAVSRD         |
| <b>MdF3'HI</b>        | LQAVIKETFR         | <u>LHPSTPLSLP</u>  | RMATESCEIN          | GFHIPKGATL        | LVNVWAVSRD         |
|                       | 401                |                    |                     |                   | 450                |
| <b>F3'HI_FJ919631</b> | PDQWSEPLEF         | RPERFMSGGE         | KPNVDIRGND          | FEVIPFGAGR        | RICAGMSLGL         |
| <b>MdF3'HI</b>        | PDQWSEPLEF         | RPERFMSGGE         | KPNVDIRGND          | FEVIPFGAGR        | RICAGMSLGL         |
|                       | 451                |                    | <b>SRS6</b>         |                   | 500                |
| <b>F3'HI_FJ919631</b> | RMVSLMTATL         | VHGFDWTLAD         | GLTPEKLNMD          | <u>EAYGLTLQRA</u> | APLMVHPRNR         |
| <b>MdF3'HI</b>        | RMVSLMTATL         | VHGFDWTLAD         | GLTPEKLNMD          | <u>EAYGLTLQRA</u> | APLMVHPRNR         |
|                       | 501                | <b>511</b>         |                     |                   |                    |
| <b>F3'HI_FJ919631</b> | LAPHAYNASS         | S                  |                     |                   |                    |
| <b>MdF3'HI</b>        | LAPHAYNASS         | S                  |                     |                   |                    |

**b**

|                  |                                                         |  |  |      |     |
|------------------|---------------------------------------------------------|--|--|------|-----|
|                  | 1                                                       |  |  |      | 50  |
| F3'HIIB_FJ919633 | MFVLIFFTVV LAFFLYRLFA PGGSRHALPL PPGPKPWPVV GNLPHLGPVP  |  |  |      |     |
| MdF3'HII         | MFVLIFFTVV LAFFLYRLFA PGGSRHALPL PPGPKPWPVV GNLPHLGPVP  |  |  |      |     |
|                  | 51                                                      |  |  |      | 100 |
| F3'HIIB_FJ919633 | HHSLAALARQ YGPLMHLRLG FVDVVVAASA SVASQFLKTH DANFSSSRPPN |  |  |      |     |
| MdF3'HII         | HHSLAALARQ YGPLMHLRLG FADVVVAASA SVASQFLKTH DANFSSSRPPN |  |  |      |     |
|                  | 101 SRS1                                                |  |  |      | 150 |
| F3'HIIB_FJ919633 | SGAKHLAYNY QDLVFAPYGP RWRMLRKISS VHLFSGKALD DLKHVRQEEV  |  |  |      |     |
| MdF3'HII         | SGAKHLAYNY QDLVFAPYGP RWRMLRKISS VHLFSGKALD DLKHVRQEEV  |  |  |      |     |
|                  | 151                                                     |  |  |      | 200 |
| F3'HIIB_FJ919633 | GVLAHGLASA GSKPVSLGQL LNVCTVNALG RVMVGRRLFG DGGGREDQKA  |  |  |      |     |
| MdF3'HII         | GVLAHGLASA GSKPVSLGQL LNVCTVNALG RVMVGRRLFG DGGGREDQKA  |  |  |      |     |
|                  | 201 SRS2                                                |  |  | SRS3 | 250 |
| F3'HIIB_FJ919633 | DEFKSMVVEM MVLAVGVFNIG DFIPALEWLD LQGVAGKMKK LHKRFDAFLT |  |  |      |     |
| MdF3'HII         | DEFKSMVVEM MVLAVGVFNIG DFIPALEWLD LQGVAGKMKK LHKRFDAFLT |  |  |      |     |
|                  | 251                                                     |  |  | SRS4 | 300 |
| F3'HIIB_FJ919633 | AIVEDHKRSG EGKHVDMLTT LLSLTDDADG EGAKLTDTEI KALLLNMFTEA |  |  |      |     |
| MdF3'HII         | AIVEDHKRSG EGKHVDMLTT LLSLTDDADG EGAKLTDTEI KALLLNMFTEA |  |  |      |     |
|                  | 301                                                     |  |  |      | 350 |
| F3'HIIB_FJ919633 | GTDTSSSTVE WAIAELLRHP KILAQLQOEL DQVVGDRDLV TESDLPNLTY  |  |  |      |     |
| MdF3'HII         | GTDTSSSTVE WAIAELLRHP KILAQLQOEL DQVVGDRDLV TESDLPNLTY  |  |  |      |     |
|                  | 351 SRS5                                                |  |  |      | 400 |
| F3'HIIB_FJ919633 | LQAVIKETFR LHPSTPLSLP RMASESCEIN GFHIPKGATL LVNVWAISRD  |  |  |      |     |
| MdF3'HII         | LQAVIKETFR LHPSTPLSLP RMASESCEIN GFHIPKGATL LVNVWAISRD  |  |  |      |     |
|                  | 401                                                     |  |  |      | 450 |
| F3'HIIB_FJ919633 | PAQWSEPLEF RPERFLPGGE KPNVDVKGND FEVIPFGAGR RICAGMTLGL  |  |  |      |     |
| MdF3'HII         | PAQWSEPLEF RPERFLPGGE KPNVDVKGND FEVIPFGAGR RICAGMTLGL  |  |  |      |     |
|                  | 451                                                     |  |  | SRS6 | 500 |
| F3'HIIB_FJ919633 | RMVSLMTATL VHGFDTLAD GLTPEKLNMD EAYGLTLQRA APLMVHPRNR   |  |  |      |     |
| MdF3'HII         | RMVSLMTATL VHGFDTLAD GLTPEKLNMD EAYGLTLQRA APLMVHPRNR   |  |  |      |     |
|                  | 501 511                                                 |  |  |      |     |
| F3'HIIB_FJ919633 | LAPHAYNASS P                                            |  |  |      |     |
| MdF3'HII         | LAPHAYNASS P                                            |  |  |      |     |

C

|          |             |            |            |            |             |
|----------|-------------|------------|------------|------------|-------------|
|          | 1           |            |            |            | 50          |
| MdF3'HI  | MFVLIVFTVV  | FAFFLYRIFA | PGGSRHSLPL | PPGPKPWPVV | GNLPHLGPVP  |
| MdF3'HII | MFVLIFFFTVV | LAFFLYRLFA | PGGSRHALPL | PPGPKPWPVV | GNLPHLGPVP  |
|          | 51          |            |            |            | 100         |
| MdF3'HI  | HHSLAALARQ  | YGPLMHLRLG | FVDVVVAASA | SVASQFLKTH | DANFSSSRPPN |
| MdF3'HII | HHSLAALARQ  | YGPLMHLRLG | FADVVAASA  | SVASQFLKTH | DANFSSSRPPN |
|          | 101 SRS1    |            |            |            | 150         |
| MdF3'HI  | SGAKHLAYNY  | QDLVFAPYGP | RWRLLRKISS | VHLFSGKALD | DLKHVRQEEV  |
| MdF3'HII | SGAKHLAYNY  | QDLVFAPYGP | RWRMLRKISS | VHLFSGKALD | DLKHVRQEEV  |
|          | 151         |            |            |            | 200         |
| MdF3'HI  | GVLAHGLASA  | GSKPVNLAQL | LNVCTVNALG | RVMVGRRLFG | NGMGGEDPKA  |
| MdF3'HII | GVLAHGLASA  | GSKPVSLGQL | LNVCTVNALG | RVMVGRRLFG | DGGGREDQKA  |
|          | 201 SRS2    |            |            | SRS3       | 250         |
| MdF3'HI  | DEFKSMVVEM  | IVLAGVFNIG | DFISSLEWLD | LQGVAGKMKK | LHKRFDAFLT  |
| MdF3'HII | DEFKSMVVEM  | MVLAGVFNIG | DFIPALEWLD | LQGVAGKMKK | LHKRFDAFLT  |
|          | 251         |            |            | SRS4       | 300         |
| MdF3'HI  | AIVEEHKRSR  | GGKHVDMLTT | LLSLKEDADG | EGAKLTDTEI | KALLLNMFTE  |
| MdF3'HII | AIVEDHKRSG  | EGKHVDMLTT | LLSLTDDADG | EGAKLTDTEI | KALLLNMFTE  |
|          | 301         |            |            |            | 350         |
| MdF3'HI  | GTDTSSTVE   | WAIAELLRHP | KILAQLQOEL | DQVVGRDRLV | TESDLPNLTY  |
| MdF3'HII | GTDTSSTVE   | WAIAELLRHP | KILAQLQOEL | DQVVGRDRLV | TESDLPNLTY  |
|          | 351         | SRS5       |            |            | 400         |
| MdF3'HI  | LQAVIKETFR  | LHPSTPLSLP | RMATESCEIN | GFHIPKGATL | LVNVWAVSRD  |
| MdF3'HII | LQAVIKETFR  | LHPSTPLSLP | RMASECEIN  | GFHIPKGATL | LVNVWAVSRD  |
|          | 401         |            |            |            | 450         |
| MdF3'HI  | PDQWSEPLEF  | RPERFMSGGE | KPNVDIRGND | FEVIPFGAGR | RICAGMSLGL  |
| MdF3'HII | PAQWSEPLEF  | RPERFLPGGE | KPNVDVKGND | FEVIPFGAGR | RICAGMTLGL  |
|          | 451         |            |            | SRS6       | 500         |
| MdF3'HI  | RMVSLMTATL  | VHGFDWTLAD | GLTPEKLNMD | EAYGLTLQRA | APLMVHPRNR  |
| MdF3'HII | RMVSLMTATL  | VHGFDWTLAD | GLTPEKLNMD | EAYGLTLQRA | APLMVHPRNR  |
|          | 501         | 511        |            |            |             |
| MdF3'HI  | LAPHAYNASS  | S          |            |            |             |
| MdF3'HII | LAPHAYNASS  | P          |            |            |             |

**Supplementary Figure S2.** Secondary mass spectra of 3-hydroxyphlotin obtained during LC-MS analysis after incubation of phloretin and NADPH in the presence of recombinant MdF3'HII (MH468789) (top) and CrCYPred (X69791) (bottom). Additional data available in Suppl. Table S4.

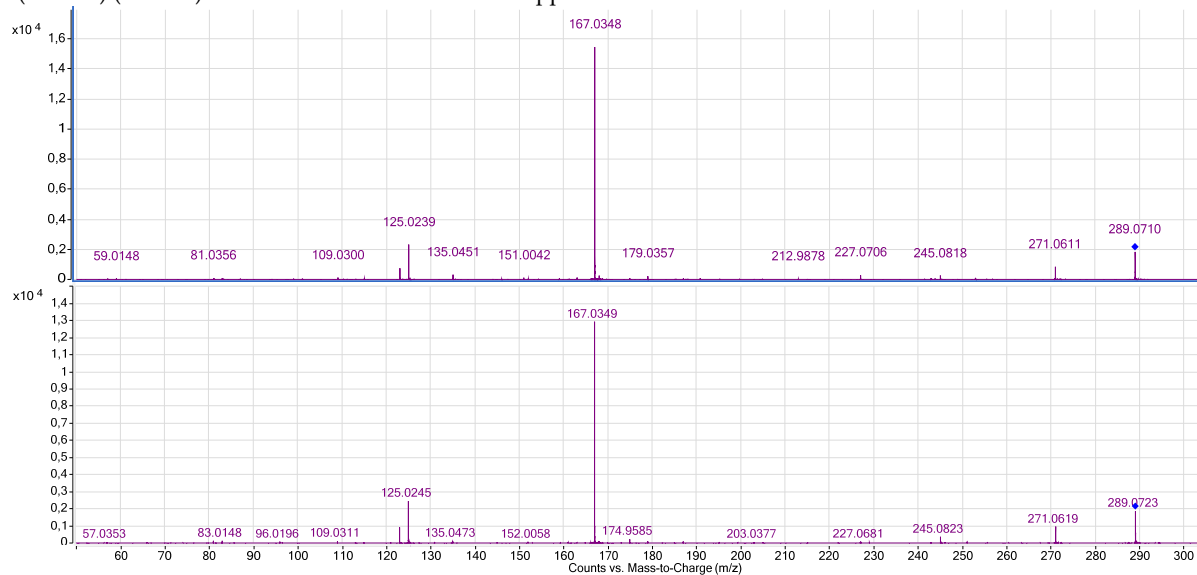

**Supplementary Figure S3.** Original of figure 2. Western blot of the recombinant enzyme preparations obtained after heterologous expression in *Saccharomyces cerevisiae*.

Lane 1: MdF3'H HI, Lane 2: MdF3'H HII, Lane 3: MdF3'H HI I22M/S224P. The Western blot analysis clearly demonstrated the presence of the recombinant proteins. The protein band at around 58 kDa shows the intact MdF3'H enzyme. MdF3'H seems smaller than the calculated size because the composition of the microsomes preparation might have an influence of the migration of the protein. The band at around 46 kDa is probably a C-terminal digested part of the F3'H.

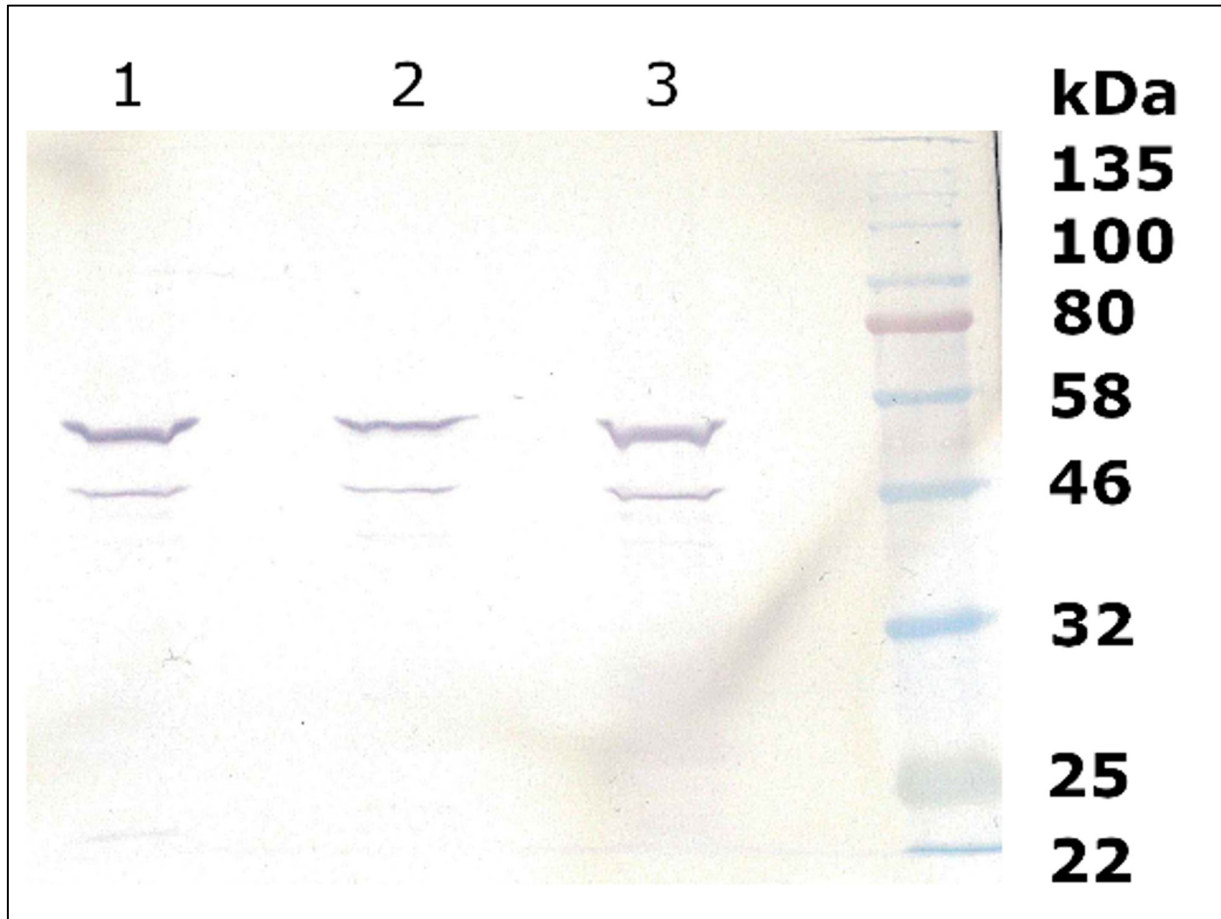

**Supplementary Table S1.** Primers used for cloning cDNAs from *M. × domestica*. Start codon ATG highlighted in bold. StarGate combinatorial sites AATG and TCCC highlighted in black. StarCombinase1 recognition area highlighted in grey. The asterisk refers to a phosphorothioate internucleotide linkage to protect primers from nuclease degradation. T<sub>a</sub>: PCR annealing temperature.

| Clone                                           | Primer (5'-3')          |                                          | T <sub>a</sub> (°C) |
|-------------------------------------------------|-------------------------|------------------------------------------|---------------------|
| <i>MdF3'HI</i>                                  | MdF3'HI-SF              | AGCGGCTCTTCAATGTTTGTTCTCATAGTCTTCACC*G   | 58                  |
|                                                 | MdF3'HI-SR              | AGCGGCTCTTCTCCCAGATGATGATGCATTGTATGC*A   |                     |
| <i>MdF3'HIb</i>                                 | MdF3'HIb-SF             | AGCGGCTCTTCAATGTTTGTTCTCATATTCTTCACC*G   | 58                  |
|                                                 | MdF3'HIb-SR             | AGCGGCTCTTCTCCCAGGTGATGACGCATTATATG*C    |                     |
| <i>MdF3'HI</i><br><i>I211M/</i><br><i>S224P</i> | F_MdF3'HI211M/<br>S224P | AACATCGGCGACTTCATCCCCTCCCTAGAGTGGCTGGAC  | 65                  |
|                                                 | R_MdF3'HI211M/<br>S224P | GAATACTCCGGCCAACACCATCATCTCCACCACCATGGAC |                     |
| <i>MdF3'HI</i><br><i>I211M</i>                  | F_MdF3H HI<br>I211M     | GGTGGAGATGATGGTGTGGCCG                   | 65                  |
|                                                 | R_MdF3H HI<br>I211M     | ACCATGGACTTGAACATCATCC                   |                     |
| <i>MdF3'HI</i><br><i>S224P</i>                  | F_MdF3'H_S224P          | CGACTTCATCCCCTCCCTAGAGT                  | 61                  |
|                                                 | R_MdF3'H_S224P          | CCGATGTTGAATACTCCG                       |                     |

**Supplementary Table S2.** Comparison of key values obtained from the codon usage analysis in the two *MdF3'H* cDNA clones. Analysis was performed by the free online-tool <https://www.genscript.com/tools/rare-codon-analysis>.

| <b>cDNA clone</b>                       | <b><i>MdF3'HI</i> (MH468788)</b> | <b><i>MdF3'HIIb</i> (MH468789)</b> |
|-----------------------------------------|----------------------------------|------------------------------------|
| <b>Codon Adaptation Index</b>           | 0.56                             | 0.56                               |
| <b>GC content [%]</b>                   | 57.24                            | 57.60                              |
| <b>Codon Frequency Distribution [%]</b> | 13                               | 12                                 |
| <b>Negative repeat elements</b>         | 0                                | 0                                  |

**Supplementary Table S3.** Optimized standard assay conditions for the recombinant F3'Hs of *Malus*

| <b><i>MdF3'HII</i></b>      | <b>Naringenin</b> | <b>Dihydrokaempferol</b> | <b>Kaempferol</b> |
|-----------------------------|-------------------|--------------------------|-------------------|
| pH optimum                  | 6.75              | 6.5                      | 6.75              |
| Temperature optimum [°C]    | 25                | n.d.                     | n.d.              |
| Time linearity [min]        | 10                | 10                       | 10                |
| Protein linearity [µg]      | 3                 | 2                        | 1.5               |
| <b><i>MdF3'HI I211M</i></b> |                   |                          |                   |
| pH optimum                  | 6.75              | 6.75                     | 6.75              |
| Temperature optimum [°C]    | 25                | n.d.                     | n.d.              |
| Time linearity [min]        | 15                | 15                       | 15                |
| Protein linearity [µg]      | 5                 | 3                        | 0.6               |

\*n.d.: not determined



**Supplementary Table S4.** Confirmation of 3-hydroxyphloretin formation from phloretin in the presence of NADPH and enzyme preparations after heterologous expression in yeast by LC–MS. *MdF3'HII*: flavonoid F3'-hydroxylaseII of *Malus x domestica* (MH468789); *CsCH3H*; chalcone 3-hydroxylase of *Cosmos sulfureus* (FJ216429); NADPH-cytochrome P450 reductase of *Catharanthus roseus* (X69791).

| Product formed by          | RT<br>(min) | m/z Parent-Ion | Daughter-Ions |               |
|----------------------------|-------------|----------------|---------------|---------------|
|                            |             |                | m/z           | Rel. Peak (%) |
| <i>MdF3'HII</i>            | 6.25        | 289.0708       | 167.0348      | 100.00        |
|                            |             |                | 125.0239      | 14.66         |
|                            |             |                | 271.0611      | 5.40          |
|                            |             |                | 123.0459      | 4.73          |
|                            |             |                | 245.0818      | 1.59          |
| <i>CsCH3H</i>              | 6.25        | 289.0723       | 167.0348      | 100.00        |
|                            |             |                | 125.0246      | 23.31         |
|                            |             |                | 123.0452      | 6.05          |
|                            |             |                | 271.0608      | 4.03          |
|                            |             |                | 245.0817      | 2.27          |
| <i>CrCypred</i>            | 6.25        | 289.0714       | 167.0349      | 100.00        |
|                            |             |                | 125.0245      | 18.64         |
|                            |             |                | 271.0619      | 7.25          |
|                            |             |                | 123.0458      | 6.88          |
|                            |             |                | 245.0823      | 2.81          |
| 3-OH-Phloretin<br>Standard | 6.25        | 289.0719       | 167.0349      | 100.00        |
|                            |             |                | 125.0246      | 18.15         |
|                            |             |                | 123.0452      | 7.00          |
|                            |             |                | 271.0613      | 5.36          |
|                            |             |                | 245.0809      | 3.74          |
